# Supplementary material
Source: Copernicus journal article supplement (doi:10.5194/egusphere-2025-459)
Supplement: Supplementary file [file egusphere-2025-459-AC2-supplement.pdf]

**We thank A/Prof Gerard Rocher-Ros for the thoughtful and constructive comments, and we are grateful for the insightful feedback provided. Below, we respond to each point raised by the reviewer (quotes in grey) and describe how we will revise the manuscript accordingly.**

**As for our understanding of the EGU sphere guidelines, we will wait to upload the revised manuscript until we are authorised by the editor (Prof. Jack Middelburg).**

The article by Malerba and others present a new chamber to measure GHG fluxes from ecosystems, in a very refined design, with telemetry, being one of the most advanced chambers available. The authors also test and present key details on the performance of the equipment, even though some details are missing that I list below.

Thank you for the positive comments.

The only bigger issue I have is a bit more details on the items and estimated cost of a Pondi. Other studies presenting similar chambers (e.g. So et al, 2024; reference below), do a great job with a table of all the main items, sources and rough cost. This would allow a better comparison to other chambers available as well as commercial options, given that the study highlights "low cost" in several places. The same paper provides a repository with more detailed documentation, which could also be necessary to do for this technical note.

Great point. We have now added a new table (Table S1) listing all hardware components and sub-components of the Pondi. We also specified that the approximate cost of the components for a Pondi is USD 750 (or AUD 1,166) and requires around six hours of specialised labour to assemble. This allows for a transparent comparison with other chambers, including the work by So et al. (2024), which we now cite.

**Table S1:** List of the primary components used in the construction of the Pondi. It includes both core and optional parts. Component: Major subsystem or category of parts (e.g., Enclosure, Solar, Sensors). Description: A brief explanation of the role of each component within the system. Sub-Component: Specific item within the component group. Units per Device: Number of units of that item required for the construction of one Pondi unit. Manufacturer: The company or brand providing the component. Generic items indicate cases where the brand is unimportant. Custom-designed parts (e.g., 3D-printed sensor mounts) were produced by Leading Edge Engineering Solutions (LEES). Items marked as optional (e.g., N<sub>2</sub>O sensor, external solar panel) can be omitted to reduce cost or power demand, depending on deployment context.

| Component            | Description                           | Sub-Component | Units per Device | Manufacturer                   |
|----------------------|---------------------------------------|---------------|------------------|--------------------------------|
| Enclosure & Mounting | Protects the internal electronics and | Enclosure     | 1.0              | Hammond Manufacturing, 1555RGY |

|                                    |                                                                                                                                                                              |                                              |     |                                                           |
|------------------------------------|------------------------------------------------------------------------------------------------------------------------------------------------------------------------------|----------------------------------------------|-----|-----------------------------------------------------------|
|                                    | sensors from environmental exposure. Provides a secure housing and mechanical structure for field deployment, including mounting points for floating or terrestrial use.     | Vent                                         | 1.0 | Amphenol LTW, VENT-PS1YGY-O8001                           |
|                                    |                                                                                                                                                                              | Chamber                                      | 1.0 | Ezy Storage, 16L Round tbasin                             |
|                                    |                                                                                                                                                                              | Pool Noodle                                  | 1.0 | Generic item                                              |
|                                    |                                                                                                                                                                              | Zip ties                                     | 7.0 | Generic item                                              |
|                                    |                                                                                                                                                                              | Label - waterproof sticker                   | 1.0 | Generic item                                              |
|                                    |                                                                                                                                                                              | Foam seal - Enclosure to PCB (internal)      | 1.0 | LEES custom design                                        |
|                                    |                                                                                                                                                                              | Foam seal - Enclosure to chamber (External)  | 1.0 | LEES custom design                                        |
|                                    |                                                                                                                                                                              | USB-C panel mount waterproof socket & cap    | 1.0 | Waterproof IP68 Type C Female to Male PFC Flat Cable 10cm |
| <b>Solar</b>                       | Onboard solar module that recharges the system's battery, enabling long-term autonomous operation without the need for external power sources.                               | Panel                                        | 1.0 | First Solar, 5V 150mA                                     |
|                                    |                                                                                                                                                                              | Panel adhesive sealant                       | 1.0 | Generic item                                              |
|                                    |                                                                                                                                                                              | Micro-Fit 2 Pin Plug                         | 1.0 | Molex, 0436450200                                         |
| <b>Solar - External (optional)</b> | An optional, larger solar panel for use in shaded environments or when higher energy capacity is needed (e.g., powering active ventilation or telemetry in low-light areas). | External Panel                               | 1.0 | Voltaic Systems P126                                      |
|                                    |                                                                                                                                                                              | External Panel - USB C plug                  | 1.0 | LEES custom design                                        |
|                                    |                                                                                                                                                                              | External Panel - Bracket, 1mm aluminium      | 1.0 | LEES custom design                                        |
|                                    |                                                                                                                                                                              | External Panel - Double-sided tape           | 1.0 | LEES custom design                                        |
|                                    |                                                                                                                                                                              | External Panel - 6mm heat shrink double wall | 1.0 | LEES custom design                                        |
| <b>PCBs &amp; Components</b>       | Core electronics, including custom-assembled circuit boards,                                                                                                                 | PCB - Main                                   | 1.0 | LEES custom design                                        |
|                                    |                                                                                                                                                                              | PCB - Breakout                               | 1.0 | LEES custom design                                        |

|                          |                                                                                                                                               |                                                  |     |                                           |
|--------------------------|-----------------------------------------------------------------------------------------------------------------------------------------------|--------------------------------------------------|-----|-------------------------------------------|
|                          | microcontrollers, data storage, and power management systems that run Pondi's operations, read sensors, and handle logging or telemetry.      | PCB - Antenna                                    | 1.0 | LEES custom design                        |
|                          |                                                                                                                                               | u.Fl cable                                       | 2.0 | TE Connectivity AMP Connectors, 2410329-2 |
|                          |                                                                                                                                               | Battery holders 18650                            | 2.0 | Generic item                              |
|                          |                                                                                                                                               | Battery cells                                    | 4.0 | INR18650B                                 |
|                          |                                                                                                                                               | BG96 mPCI-e                                      | 1.0 | Quectel, BG96                             |
|                          |                                                                                                                                               | mPCie Standoffs                                  | 2.0 | Wurth Elektronik, 9774015151R             |
|                          |                                                                                                                                               | SIM card (cost of each card before data charges) | 1.0 | Generic item                              |
|                          |                                                                                                                                               | Micro-Fit 2 Pin Socket                           | 1.0 | Generic item                              |
|                          |                                                                                                                                               | 6-pin sensor cable to breakout PCB               | 1.0 | INR18650B                                 |
| <b>Other Sensors</b>     | Sensors to measure CO <sub>2</sub> , CH <sub>4</sub> , temperature, and humidity, critical for calculating gas fluxes.                        | Methane (CH <sub>4</sub> )                       | 1.0 | Figaro TGS2611-E00                        |
|                          |                                                                                                                                               | Carbon Dioxide (CO <sub>2</sub> )                | 1.0 | Sensirion AG, SCD40-D-R2                  |
| <b>Fastners</b>          | Includes bolts, nuts, and screws required to assemble the chamber, secure electronics, and mount components within the enclosure.             | M2.5x4 (mPCle)                                   | 2.0 | Generic item                              |
|                          |                                                                                                                                               | M3x6                                             | 4.0 | Generic item                              |
|                          |                                                                                                                                               | M3x12                                            | 2.0 | Generic item                              |
| <b>Printed Parts</b>     | 3D-printed or custom-fabricated parts used to hold sensors, guide airflow, or support other mechanical and structural elements of the system. | Stem                                             | 1.0 | LEES custom design                        |
|                          |                                                                                                                                               | nut                                              | 1.0 | LEES custom design                        |
|                          |                                                                                                                                               | Battery holders                                  | 2.0 | LEES custom design                        |
|                          |                                                                                                                                               | Antenna mount                                    | 1.0 | LEES custom design                        |
| <b>Other Consumables</b> | Miscellaneous materials needed for assembly and                                                                                               | Micro-Fit Pins                                   |     | Generic item                              |
|                          |                                                                                                                                               | Filament - ABS (kg)                              |     | Generic item                              |

|                                  |                                                                                                                                                                                                            |                       |     |                                   |
|----------------------------------|------------------------------------------------------------------------------------------------------------------------------------------------------------------------------------------------------------|-----------------------|-----|-----------------------------------|
|                                  | maintenance, such as adhesives, sealants, tubing, or cable ties, that ensure secure, leak-proof operation.                                                                                                 | Conformal coating     |     | Generic item                      |
| <b>N2O (optional)</b>            | Optional N <sub>2</sub> O sensor and associated components for measuring nitrous oxide fluxes. May be excluded to reduce cost or power demand if only CH <sub>4</sub> and CO <sub>2</sub> are of interest. | N2O Sensor            | 1.0 | Dynamant Platinum P/N2OP/NC/4/P   |
|                                  |                                                                                                                                                                                                            | N2O - PCB             | 1.0 | Dynamant                          |
|                                  |                                                                                                                                                                                                            | N2O - Panel mount     | 1.0 | Dynamant                          |
|                                  |                                                                                                                                                                                                            | N2O - Cable           | 1.0 | 4-core flexible cable             |
|                                  |                                                                                                                                                                                                            | N2O - 4pin molex plug | 1.0 | Molex, 0430250400                 |
|                                  |                                                                                                                                                                                                            | N2O - Gland           | 1.0 | 12mm cable gland                  |
|                                  |                                                                                                                                                                                                            | N2O - Silicon mix     | 1.0 | MG Chemicals Black Flexible Epoxy |
|                                  |                                                                                                                                                                                                            | N2O - Petroleum jelly |     | Generic item                      |
|                                  |                                                                                                                                                                                                            | Printed mold          | 2.0 | LEES custom design                |
| <b>Active Venting (optional)</b> | An add-on module that includes a small pump and microcontroller for periodically flushing the chamber with ambient air to reset internal gas concentrations between measurements.                          | Pump                  | 1.0 | Adafruit Industries LLC, 4700     |
|                                  |                                                                                                                                                                                                            | Solenoid              | 1.0 | DFRobot, DFR0866                  |
|                                  |                                                                                                                                                                                                            | Control PCB           | 1.0 | LEES custom design                |
|                                  |                                                                                                                                                                                                            | Printed frame         | 1.0 | LEES custom design                |
|                                  |                                                                                                                                                                                                            | Tubing                | 1.0 | Generic item                      |
|                                  |                                                                                                                                                                                                            | Gland                 | 1.0 | 12mm cable gland                  |
|                                  |                                                                                                                                                                                                            | Vent                  | 1.0 | 12mm mesh vent                    |
|                                  |                                                                                                                                                                                                            | Vent O-ring           | 1.0 | Generic item                      |

Finally, the paper mentioned above, are able to separate diffusive from ebullitive fluxes of methane, which is something this study could also explore. Maybe no need to do a new analysis, but mentioning this capacity could be relevant.

Thank you for highlighting this. While the Pondi was designed to capture total net gas fluxes (ebullition + diffusion), the high-frequency sampling capabilities and venting mechanism offer the potential to distinguish between diffusive and ebullitive events based on temporal

discontinuities in CH<sub>4</sub> concentration data. Although we have not yet conducted a systematic analysis to separate these flux types, there are published methodologies to do so. We added a statement in the discussion to highlight this potential and suggest it as a priority for future methodological development.

L50: The first paragraph on the different gasses is too broad on the global sources, it could already be narrowed down to the key ecosystems that this study targets. Particularly relevant would be for methane, as half of global emissions are from aquatic ecosystems (Global Methane Budget, Saunio et al 2025, ESSD). The "UN Environment programme, 2023" has a type and is maybe not the best reference.

We agree this section could be more targeted. We revised the paragraph to narrow the scope toward the types of systems targeted by Pondi—namely, small artificial and semi-natural aquatic systems such as farm dams, reservoirs, wastewater lagoons, and vegetated soils. We now cite Saunio et al. (2025, Earth System Science Data) from the Global Methane Budget to better contextualise the importance of aquatic ecosystems in global CH<sub>4</sub> emissions. We also replaced the UN Environment Programme citation with Saunio et al. (2025, Earth System Science Data) and Shukla et al. (2022, IPCC).

L74: If spelling out companies like this, would it be needed to provide references for them?

We added info on the specific products by these companies:

- Picarro (e.g., G2508 and G2509 Gas Concentration Analyzer)
- Los Gatos Research (e.g., Ultraportable Greenhouse Gas Analyzer)
- Li-COR (e.g., LI-7810 and LI-7815)

L93: A key reference missing here would be So et al, 2024

We added So et al., (2024, Biogeosciences) in the text.

L198: Some details on the external unit with the air pump are missing: What is the specific design here, which type of fan?

We expanded the relevant methods section to include a description of the external venting unit. It consists of a weatherproof housing that encloses a 5V miniature air pump (4700 Adafruit Industries), controlled by a control PCB to activate the pump for one hour at user-defined intervals (e.g., weekly). The air is filtered and injected into the chamber through a 6 mm silicone tube connected to a dedicated port.

L426: Cannot see arrows in the figure, which are mentioned in the caption.

Thank you for spotting this typo. We have revised the figure to add the arrows indicating the venting events (see below).

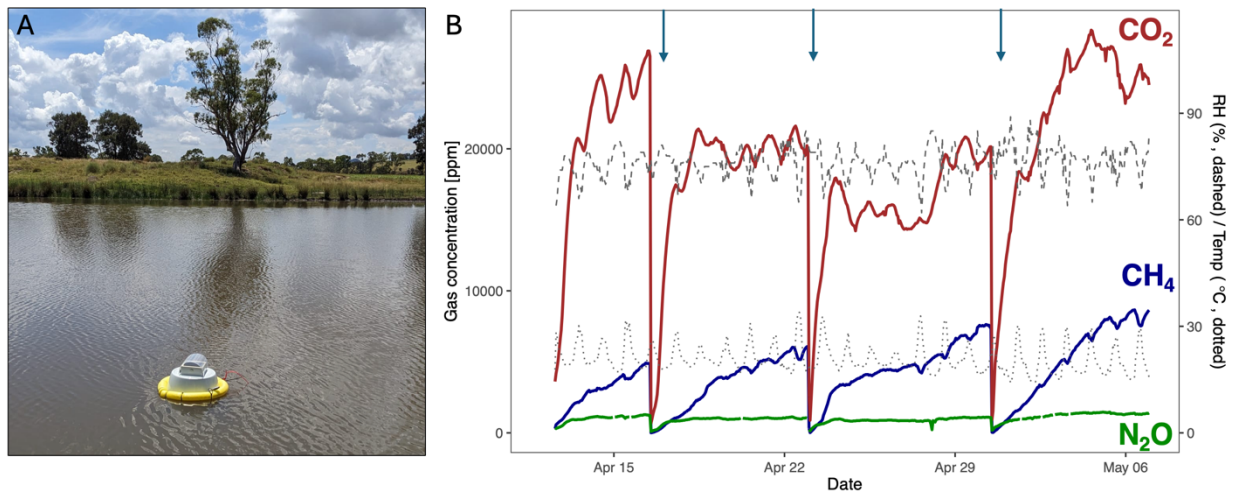

**Figure 6:** (A) *Pondi* in a farm dam. (B) Four weeks of hourly  $\text{CO}_2$ ,  $\text{CH}_4$ ,  $\text{N}_2\text{O}$ , relative humidity (RH), and temperature measurements inside the floating chamber of a *Pondi* in a farm dam. The arrows indicate the three venting events when the air pump diluted gas concentrations by injecting fresh air into the chamber.
